# Supplementary material for: The identification of ᴅ-tryptophan as a bioactive substance for postembryonic ovarian development in the planarian Dugesia ryukyuensis
Source: PubMed Central journal article supplement (PMC5364533; doi:10.1038/srep45175), 2017-03-24
Supplement: srep45175-s1.pdf [file srep45175-s1.pdf]

**Title: The identification of D-tryptophan as a bioactive substance for postembryonic ovarian development in the planarian *Dugesia ryukyuensis***

**Authors:** Kazuya Kobayashi<sup>a,\*</sup>, Takanobu Maezawa<sup>b</sup>, Hiroyuki Tanaka<sup>c</sup>, Hiroyuki Onuki<sup>d,1</sup>, Yurie Horiguchi<sup>e</sup>, Hiroshi Hirota<sup>d,2</sup>, Tetsuo Ishida<sup>c,3</sup>, Kihachiro Horiike<sup>c</sup>, Yasutoshi Agata<sup>c</sup>, Manabu Aoki<sup>f</sup>, Motonori Hoshi<sup>f</sup> and Midori Matsumoto<sup>f</sup>

**Author affiliations:**

<sup>a</sup>Department of Biology, Faculty of Agriculture and Life Science, Hirosaki University, 3 Bunkyo-cho, Hirosaki, Aomori 036-8561, Japan

<sup>b</sup>Advanced Science Course, Department of Integrated Science and Technology, National Institute of Technology, Tsuyama College, 624-1 Numa, Tsuyama, Okayama 708-8509, Japan

<sup>c</sup>Department of Biochemistry and Molecular Biology, Shiga University of Medical Science, Tsukiwa-cho, Seta, Ohtsu, Shiga 520-2192, Japan

<sup>d</sup>RIKEN Genomic Sciences Center, 1-7-22 Suehiro-cho, Tsurumi-ku, Yokohama 230-0045, Japan

<sup>e</sup>Center for Integrated Medical Research, School of Medicine, Keio University, 35 Shinano-machi, Shinjuku-ku, Tokyo 160-8582, Japan

<sup>f</sup>Department of Biosciences and Informatics, Keio University, 3-14-1 Hiyoshi, Kouhoku-ku, Yokohama 223-8522, Japan

**\*Corresponding authors:**

**Kazuya Kobayashi**

Department of Biology, Faculty of Agriculture and Life Science, Hirosaki University, 3 Bunkyo-cho, Hirosaki, Aomori 036-8561, Japan

Tel & Fax: 81-172-39-3587 E-mail: [kobkyram@hirosaki-u.ac.jp](mailto:kobkyram@hirosaki-u.ac.jp)

## **Supplementary Information:**

Fig. S1

Legend of Fig. S1

Fig. S2

Legend of Fig. S2

Fig. S3

Legend of Fig. S3

Table S1

Materials and Methods

# Fig. S1

## A

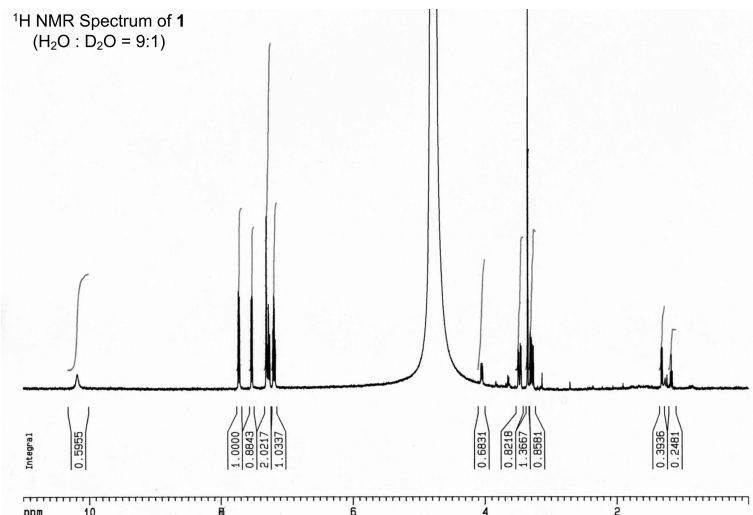

## B

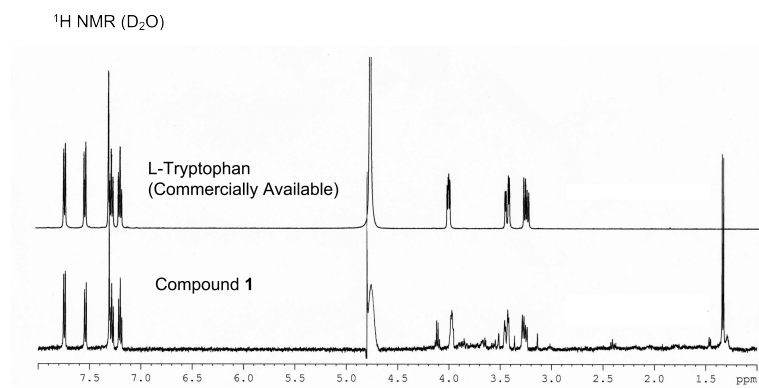

## C

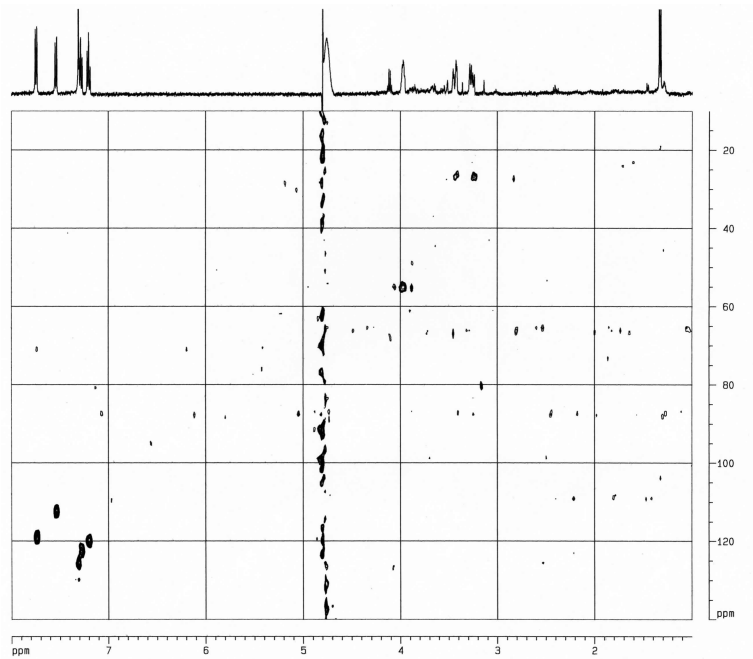

## D

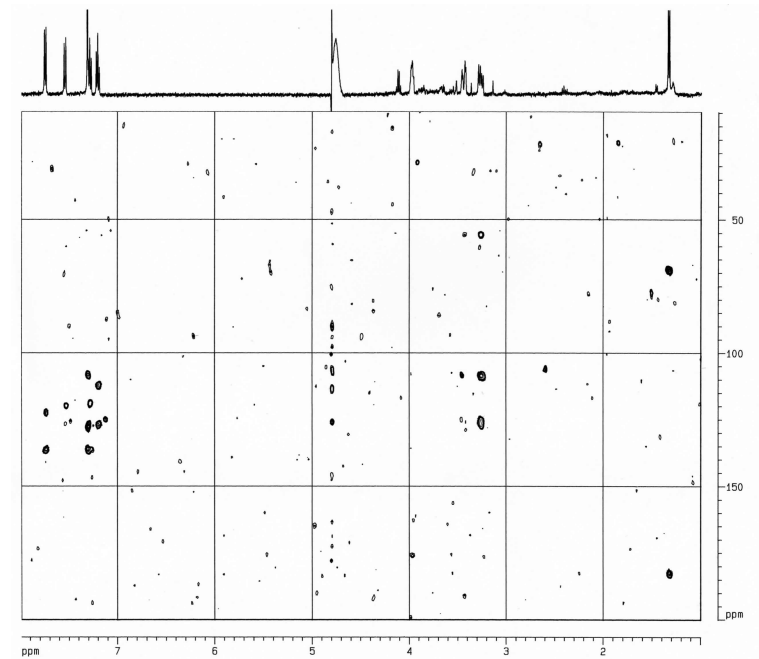

## E

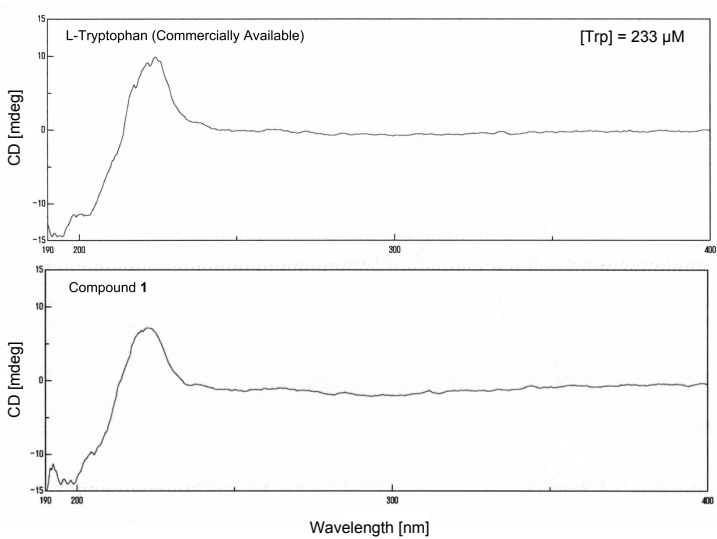

## F

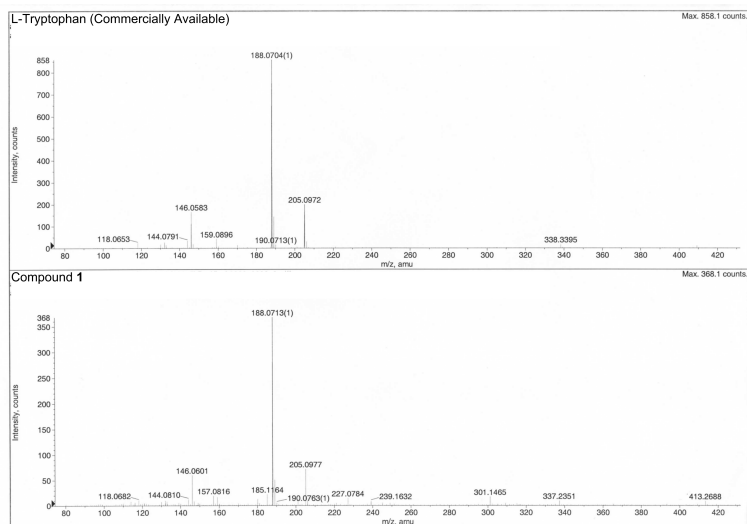

1 **Fig. S1.** Spectral data of compound **1** from Q1 obtained using RESOURCE Q. **(A)**  $^1\text{H}$  NMR  
2 spectrum of compound **1** in  $\text{H}_2\text{O}-\text{D}_2\text{O}$  (9:1), **(B)**  $^1\text{H}$  NMR spectra of compound **1** and  
3 commercially available L-Trp in  $\text{D}_2\text{O}$ .  $\delta$ 10.17 (br), 7.75 (d, 1H,  $J = 8$  Hz), 7.54 (d, 1H,  $J = 8$   
4 Hz), 7.31 (s, 1H), 7.29 (dd, 1H,  $J = 8, 8$  Hz), 7.20 (dd, 1H,  $J = 8, 8$  Hz), 4.04 (dd, 1H,  $J = 8,$   
5 5 Hz), 3.42 (dd, 1H,  $J = 15, 5$  Hz), 3.24 (dd, 1H,  $J = 15, 8$  Hz); **(C)** Hetero-nuclear multiple  
6 quantum coherence (HMQC) spectrum of compound **1** in  $\text{D}_2\text{O}$ , **(D)** Hetero-nuclear  
7 multiple-bond connectivity (HMBC) spectrum of compound **1** in  $\text{D}_2\text{O}$ .  $^{13}\text{C}$  NMR ( $\text{D}_2\text{O}$ )  
8  $\delta$ 176.0 (s), 136.7 (s), 127.3 (s), 125.5 (d), 123.0 (d), 120.4 (d), 118.6 (d), 112.8 (d), 108.4 (s),  
9 54.8 (d), 26.4 (t); **(E)** CD spectra of compound **1** and commercially available L-Trp. CD  
10 ( $\text{H}_2\text{O}$ ) 223 nm ( $\Delta\epsilon + 6.4$ ); **(F)** Electrospray ionization–mass spectrometry (ESI-MS)/MS  
11 spectra of compound **1** and commercially available L-Trp. ESI-MS/MS  $m/z$  205, 188, 146.  
12  
13

Fig. S2

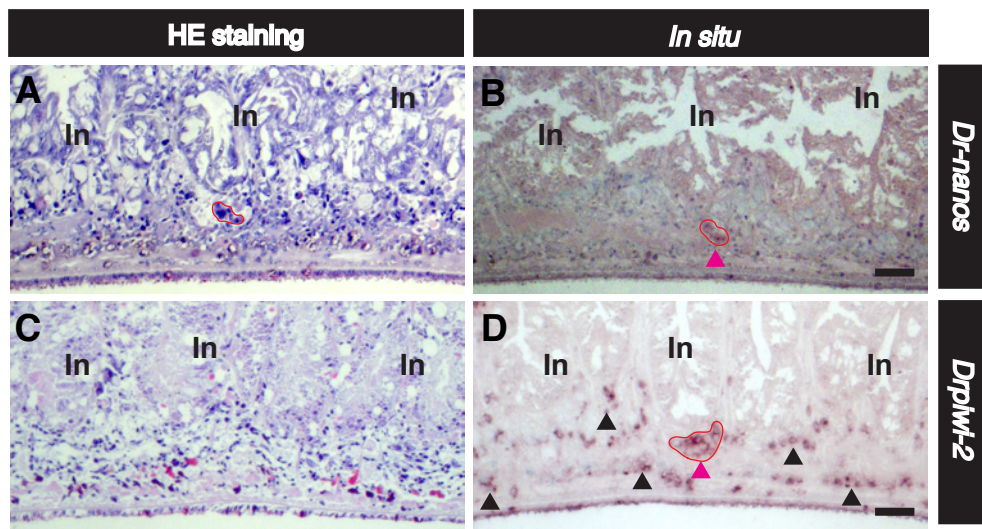

1 **Fig. S2. Expression of *Dr-nanos* and *Drpiwi-2* in tissue surrounding ovary development**  
2 **sites in asexual worms. (A–D)** Tissue areas encompassed by the red line are cell masses of  
3 female PGCs (ovarian primordia). The dorsal sides are located at the top of images. In:  
4 intestine. Scale bar: 50  $\mu$ m. Two successive serial paraffin sections were used for staining  
5 with HE and *in situ* hybridization with each other. **(A, C)** HE staining. **(B)** *In situ*  
6 hybridization of *Dr-nanos*. **(D)** *In situ* hybridization of *Drpiwi-2*. The ovarian primordia  
7 displaying *in situ* hybridization signal are indicated by magenta arrowheads. *Drpiwi-2* is  
8 expressed in neoblasts as well as in germline cells<sup>40</sup>. In asexual worms, equal levels of  
9 *Drpiwi-2* expression are detected in both ovarian primordia and neoblasts (indicated by  
10 black arrowheads). Typical ovarian primordia were not identified in the HE image **(C)**.

Fig. S3

**A**

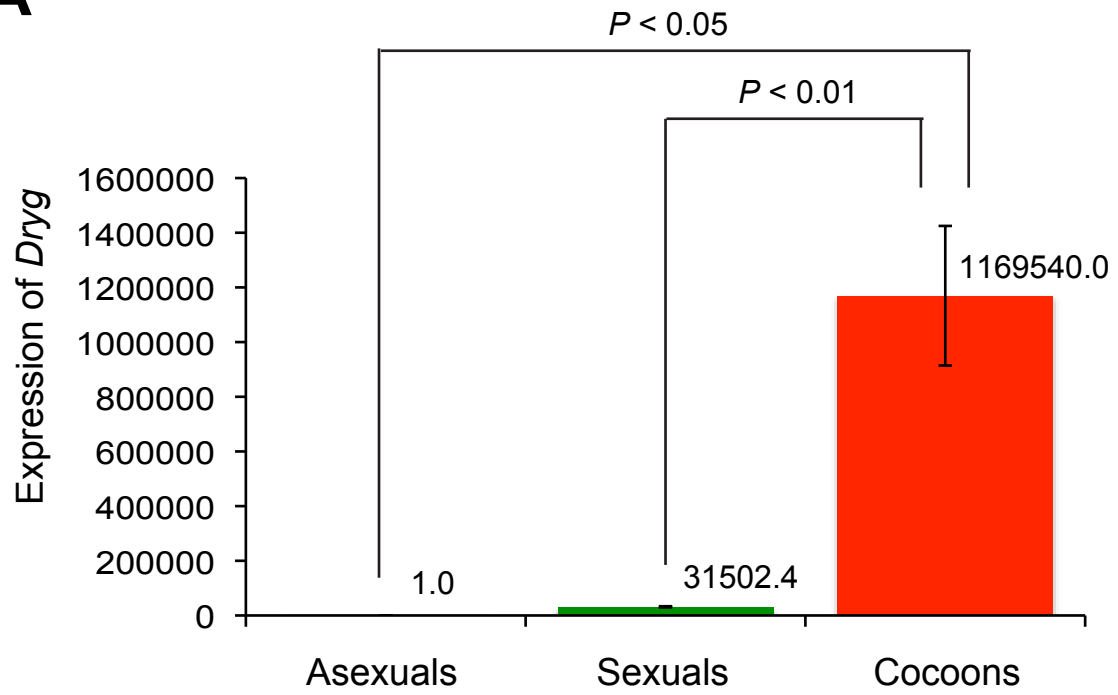

**B**

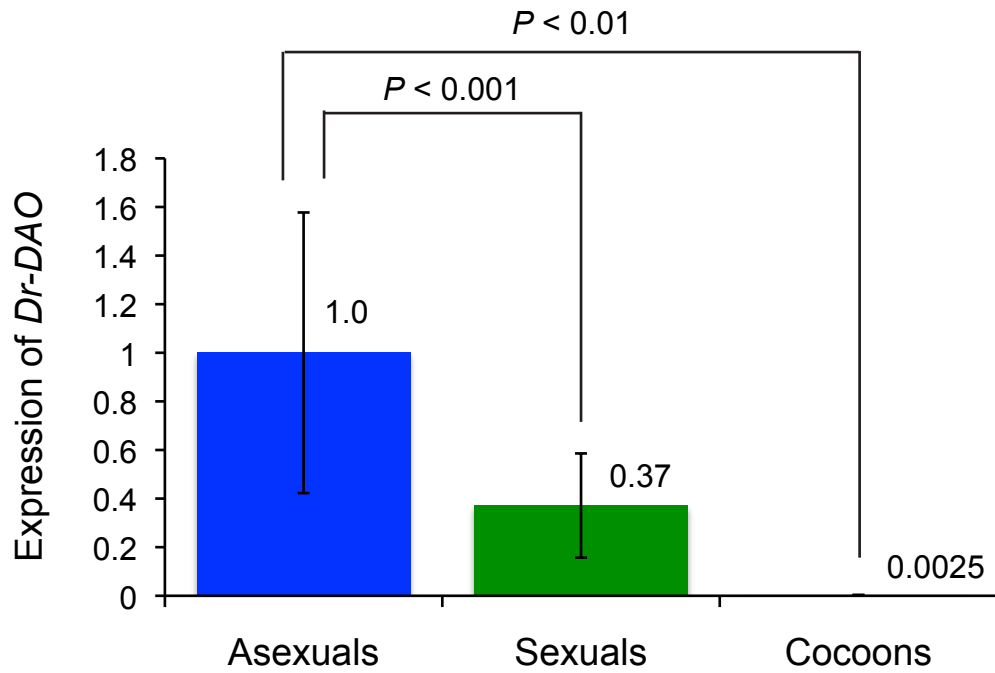

1 **Fig. S3. Quantitative reverse transcription polymerase chain reaction (qRT-PCR)**  
2 **analysis of *Dryg* and *Dr-DAO* expression in asexual worms, sexual worms, and cocoons**  
3 **of *D. ryukyuensis*.** qRT-PCR of (A) *Dryg*, a marker gene for yolk gland cells was  
4 performed in asexual worms of the OH strain, sexual worms of the OH strain, and their  
5 cocoons just after deposition, and (B) *Dr-DAO*, a *DAO* (D-amino acid oxidase) homolog  
6 gene was also analyzed. Expression values are represented as the average of three asexual  
7 worms, three sexual worms, and three cocoons, respectively ( $\pm$  S.E.). The results represent  
8 relative expression in the asexual worms. Statistical significance was calculated using a  
9 *t*-test.  
10



**Table S1.** Relative amounts of each proteinogenic amino acid in asexual worms, sexual worms, and cocoons.

| Amino acid | Relative area |          |          | Sexual/Asexual | Cocoons/Asexual |
|------------|---------------|----------|----------|----------------|-----------------|
|            | Asexual       | Sexual   | Cocoons  |                |                 |
| Trp        | 1.40E-02      | 2.30E-01 | 6.10E-01 | 16.4           | 43.6            |
| Tyr        | 2.20E-02      | 1.60E-01 | 6.50E-02 | 7.3            | 3.0             |
| Cys        | 1.10E-03      | 3.00E-03 | N.D.*    | 2.7            | N.D.*           |
| Gln        | 4.10E-02      | 7.30E-02 | 1.20E-02 | 1.8            | 0.3             |
| Asp        | 1.30E-01      | 2.00E-01 | 9.50E-02 | 1.5            | 0.7             |
| Thr        | 2.60E-02      | 3.60E-02 | 4.20E-02 | 1.4            | 1.6             |
| Ala        | 1.30E-01      | 1.80E-01 | 2.60E-02 | 1.4            | 0.2             |
| Asn        | 3.20E-02      | 4.10E-02 | 2.30E-02 | 1.3            | 0.7             |
| Pro        | 2.40E-02      | 3.00E-02 | 1.20E-02 | 1.3            | 0.5             |
| Ile        | 6.60E-02      | 7.60E-02 | 1.70E-02 | 1.2            | 0.3             |
| His        | 9.00E-02      | 1.00E-01 | 7.80E-02 | 1.1            | 0.9             |
| Phe        | 4.80E-02      | 5.20E-02 | 8.10E-02 | 1.1            | 1.7             |
| Lys        | 8.90E-02      | 9.40E-02 | 4.60E-02 | 1.1            | 0.5             |
| Ser        | 5.50E-02      | 5.70E-02 | 3.50E-02 | 1.0            | 0.6             |
| Gly        | 2.10E-02      | 2.20E-02 | 6.10E-03 | 1.0            | 0.3             |
| Leu        | 9.10E-02      | 9.20E-02 | 1.80E-02 | 1.0            | 0.2             |
| Val        | 8.30E-02      | 8.10E-02 | 1.50E-02 | 1.0            | 0.2             |
| Arg        | 8.50E-02      | 7.60E-02 | 2.40E-02 | 0.9            | 0.3             |
| Glu        | 2.40E-01      | 1.90E-01 | 2.70E-02 | 0.8            | 0.1             |
| Met        | 1.60E-02      | 9.30E-03 | 1.60E-03 | 0.6            | 0.1             |

\*Not detected.

1 **Materials and Methods**

2

3 **Quantitative reverse transcription-polymerase chain reaction (qRT-PCR)**

4 Besides the visual evaluation of sex-inducing activity, we used qRT-PCR to analyze  
5 the expression of marker genes required for sexual induction. qRT-PCR was  
6 performed using the 7300 Real-Time PCR System (Applied Biosystems, Foster City,  
7 CA). Each reaction mixture (25  $\mu$ L) contained 12.5  $\mu$ L of Power SYBR Green PCR  
8 Master mix (Applied Biosystems, Foster City, CA), 0.4  $\mu$ M of gene-specific primers,  
9 and 0.5  $\mu$ L of the cDNA template. The PCR reaction was as follows: 50°C for 2 min  
10 and 95°C for 10 min, followed by 40 cycles of 95°C for 15 s and 60°C for 1 min.  
11 Measurements were normalized to the expression levels of the elongation factor 1  
12 alpha homolog (*Dr-ef1a*). The gene-specific primers used were as follows:

13 *Dr-ef1a/DrC\_00434*, 5' -TTGGTTATCAACCCGATGGTG-3' and reverse, 5'  
14 -TCCCATCCCTTGTACCATGAC-3' <sup>64</sup>; *Dr-DAO* forward, 5'  
15 -TCGCTACCAATCCAAAGCATC-3' and reverse, 5'  
16 -CGGCTGTTTCCCACAATTTC-3' <sup>50</sup>; *Dryg* forward, 5'  
17 -AAATCTATCGTTGCCCGATG-3' and reverse, 5'  
18 -TCGCATCGTTTTGATGTTTG-3' <sup>47</sup>.

19

20 **Quantitative analysis of amino acids**

21 Asexual worms, sexual worms, and fresh cocoons of *Dugesia ryukyuensis* were used  
22 for quantitative analysis of proteinogenic amino acids (Human Metabolome  
23 Technologies Inc., Tsuruoka, Japan). Asexual worms (30 mg wet weight, 5 worms),  
24 sexual worms (36 mg wet weight, 3 worms), and fresh cocoons (30 mg wet weight,  
25 10 cocoons) were used. Frozen samples were transferred into 1,500  $\mu$ L of 50%  
26 aqueous acetonitrile (v/v) containing 20  $\mu$ M of the external standard. After

27 homogenization using BMS-M10N21 equipment (BMS, Tokyo) at 1,500 rpm for  
28 120 s on ice performed three times, the suspensions were centrifuged at 2,300 g for 5  
29 min at 4°C. The resultant supernatants were ultrafiltered using a Millipore  
30 Ultrafree-MC PLHCC HMT Centrifugal Filter Device, 5 kDa (Millipore, Billerica,  
31 MA). The filtrates were then dried and dissolved in 50 µL of ultrapure water. The  
32 samples obtained were then subjected to capillary electrophoresis time-of-flight  
33 mass spectrometry (CE-TOFMS) analysis using the Agilent CE-TOFMS system  
34 (Agilent Technologies, Santa Clara, CA) at 4°C. The detected peaks were aligned  
35 according to their m/z values and normalized migration times. The peaks were  
36 mean-centered and scaled using their standard deviations on a per-peak basis as a  
37 pretreatment. The relative area, m/z, and retention time (RT) of each peak were  
38 obtained using the software MasterHands ver.2.16.0.15 (Keio University, Japan).  
39 Each peak corresponding to a proteinogenic amino acid was identified on the basis  
40 of m/z and RT. The relative area of each peak corresponding to a proteinogenic  
41 amino acid was used for comparison of the asexual worms, the sexual worms, and  
42 the fresh cocoons.  
43
